# Supplementary material
Source: Research Square preprint supplement (doi:10.21203/rs.3.rs-9651787/v1)
Supplement: Supplementary file 1 [file 0aa5983269db77d1daf2a8cb.pdf]

## **Supplementary Review file: mass spectrometry data**

### **Rhs toxin complexes secreted via the type IX secretion system mediate kin discrimination in environmental Bacteroidota**

Marie Grandjean, Martina Rudgalvytė, Thomas Delobelle, Mostafa Elomari, Nicolas Marchal, Thierry Oms, Maelle Paillat, Marc Dieu, Eric Cascales, Nelle Varoquaux, Sophie S. Abby, Rémi Fronzes, Thierry Doan, Dukas Jurėnas

#### **Reviewer access details**

Log in to the PRIDE website using the following details:

**Project accession:** PXD079050

**Token:** 428w4buN8oPz
