# Supplementary material
Source: Research Square preprint supplement (doi:10.21203/rs.3.rs-9651787/v1)
Supplement: Supplementary file 2 [file 208c5a1306d70773624949b1.pdf]

## **Supplementary information**

### **Rhs toxin complexes secreted via the type IX secretion system mediate kin discrimination in environmental Bacteroidota**

Marie Grandjean, Martina Rudgalvytė, Thomas Delobelle, Mostafa Elomari, Nicolas Marchal,  
Thierry Oms, Maelle Paillat, Marc Dieu, Eric Cascales, Nelle Varoquaux, Sophie S. Abby,  
Rémi Fronzes, Thierry Doan, Dukas Jurėnas

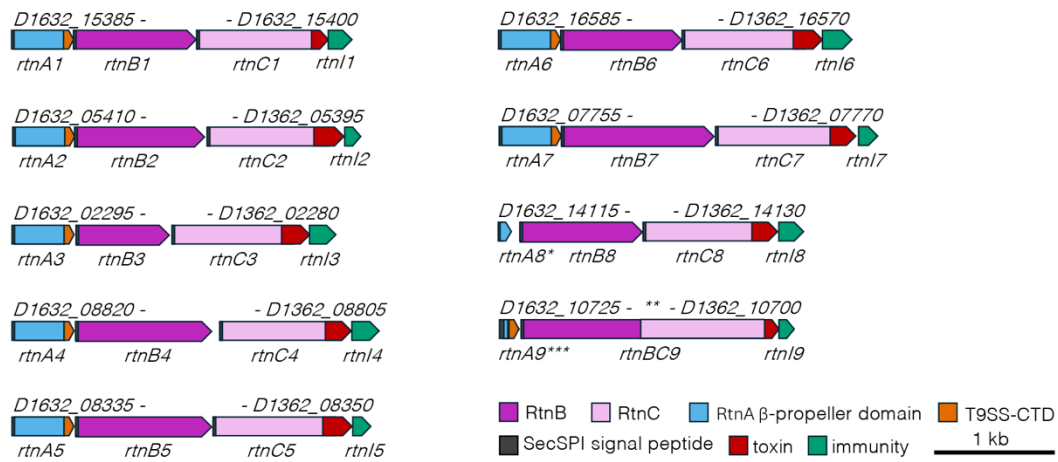

**Figure S1 | *Rtn* loci in *C. nematophagum* JUb275 genome.** Representation of genetic organisation of all *rtn* loci in the genome of *C. nematophagum* JUb275 (accession number: SAMN09925764). Genes coding for RtnA are shown in blue, RtnB in dark magenta, RtnC in light magenta. Toxic domains of RtnCs are shown in red and genes coding putative immunity proteins are shown in green. Scale, 1 kb. \* gene of *rtnA8* is C-terminally truncated and lacks most of the  $\beta$ -propeller and the T9SS-CTD domain. \*\* in the deposited genome, *rtnBC9* is truncated by nonsense mutations, the scheme corresponds to full length ORF as confirmed by re-sequencing. \*\*\* *rtnA9* does not have complete  $\beta$ -propeller domain, only a short fragment of two strands and T9SS-CTD-like domain.

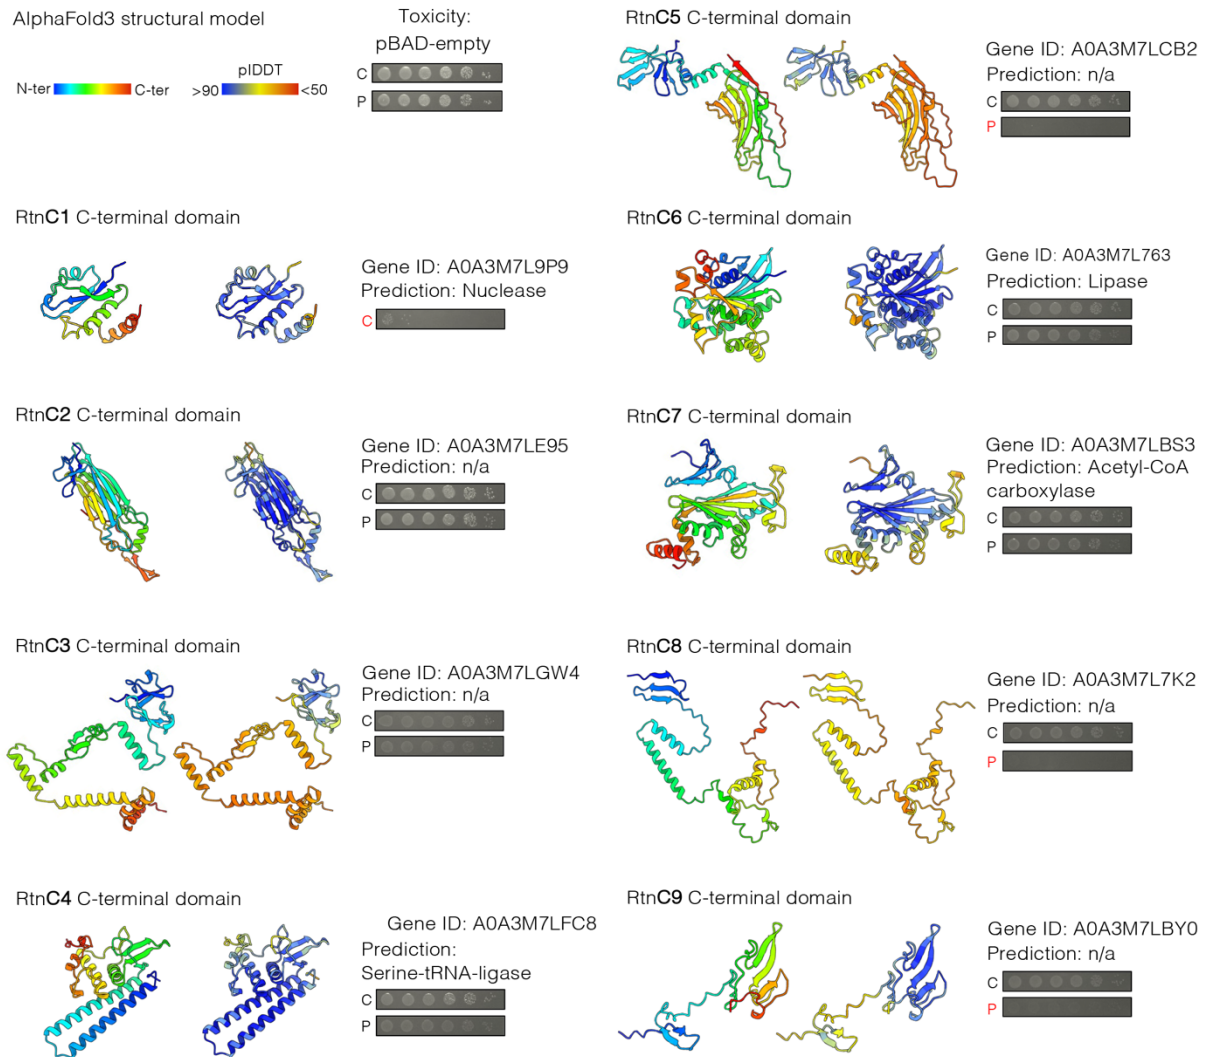

**Figure S2 | C-termini of *rtnC* code for variety of toxic domains.** AlphaFold3 structural models of RtnC C-terminal toxic domains coloured from N- to C-terminus (left model), and by pIDDT values (right model). GeneBank accession numbers of corresponding *rtnC* are provided on the right if each panel alongside functional prediction based on structural comparisons using DALI server and AlphaFold3 models as inquiry. Toxicity assays correspond to heterologous expression of toxic domains in *E. coli*. *E. coli* cells were transformed with pBAD33 vectors encoding C-terminal variable toxic domains for expression in cytoplasm (C) or in the periplasm (P) by cloning in fusion with *tat* secretion signal peptide from *torA* gene. Overnight cultures were serially diluted ( $10^{-1}$  to  $10^{-6}$ , from left to right) and spotted on LB agar plates supplemented with 1% of L-arabinose.



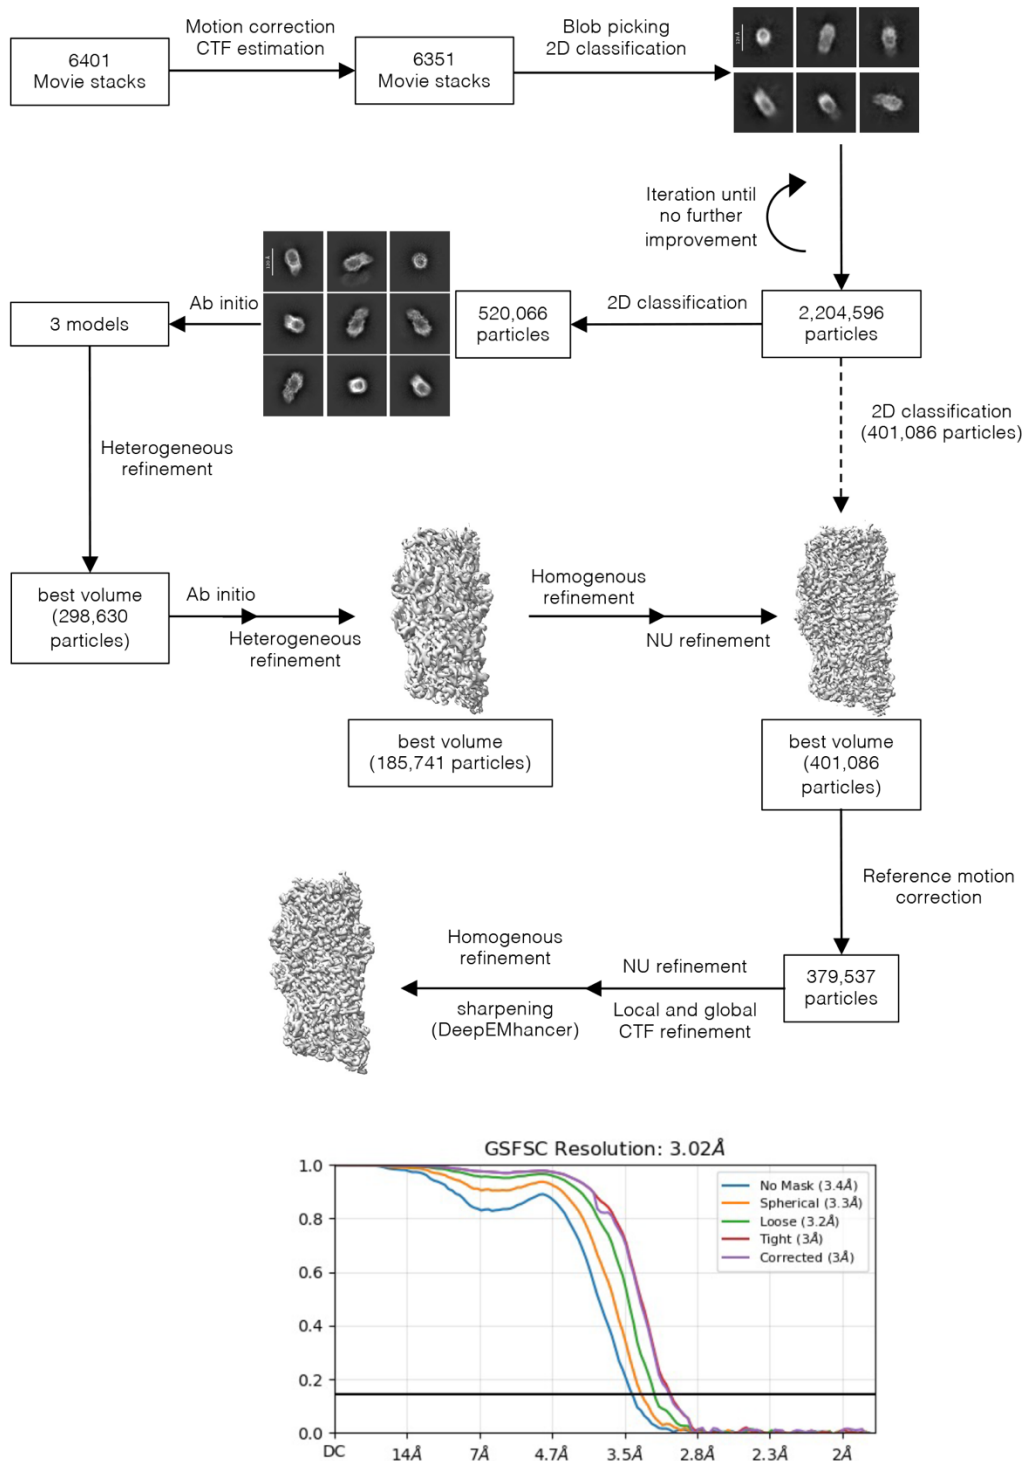

**Figure S4 | Workflow of cryo-EM data-processing.** Workflow depicting procedures of data analysis used to generate final cryo-EM density map of RtnB1-RtnC1 at 3.4 Å (unmasked) resolution. Numbers of movie stacks, particles and volumes used at all essential steps are provided in boxes and procedures are indicated above arrows. Fsc curve of last refinement is provided below.

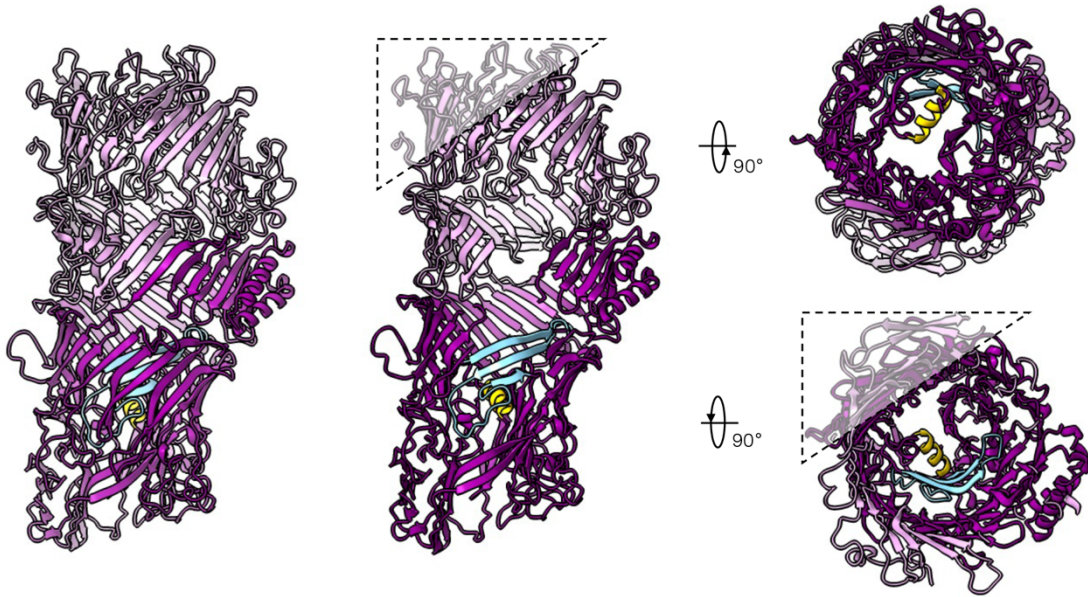

**Figure S5 | N-terminal RtnB1 features involved in closing the bottom of the cocoon.** Cryo-EM structure of the RtnBC1 cocoon (left) or its cut-through view (middle), as well as bottom view (right, top) and cut-through view from the top (bottom, right). N-terminal helix corresponding to residues 33-43 of full length RtnB1 (or 9-19 without the signal peptide) is shown in yellow and following inner  $\beta$ -sheet layer corresponding to residues 54-98 of full length RtnB1 (or 30-74 without the signal peptide) is shown in blue.

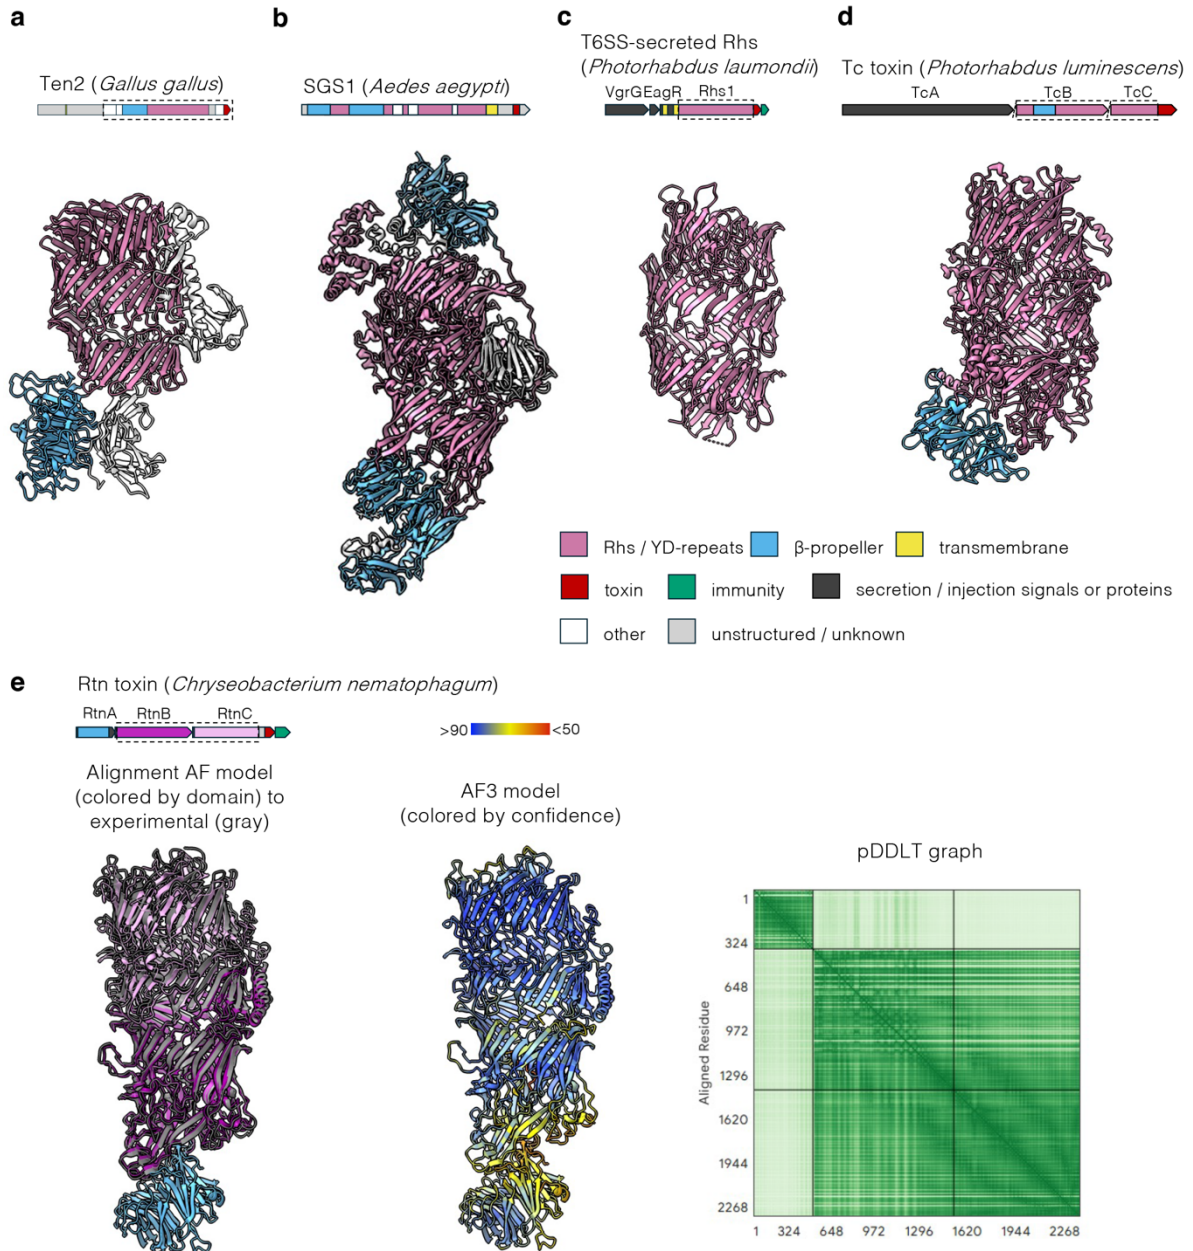

**Figure S6 | Structural comparison of Rhs repeat-comprising proteins.** **a** Chicken teneurin Ten2 (PDB: 6FB3); **b** Mosquito salivary gland surface protein 1 (PDB: 8FJP); **c** *Photorhabdus laumondii* T6SS-secreted Rhs1 toxin (PDB: 7PQ5); **d** *Photorhabdus luminescens* insecticidal Tc toxin (PDB: 6H6F). **e** *Chryseobacterium nematophagum* Rtn toxin (this study), colored in gray overlaid with AlphaFold3 model of complete secreted RtnABC1 complex colored by chain as shown in scheme (left) and by confidence (middle). Predicted Local Distance Difference Test graph for the AF3 model of RtnABC1 is provided on the right.

**a**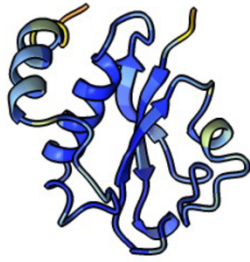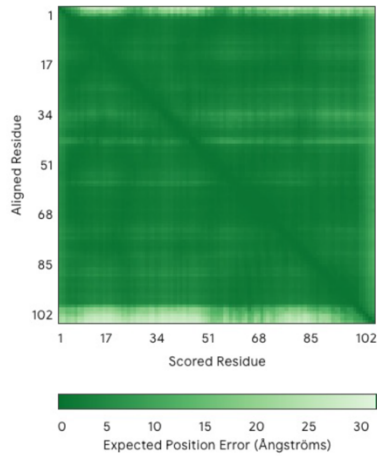**b**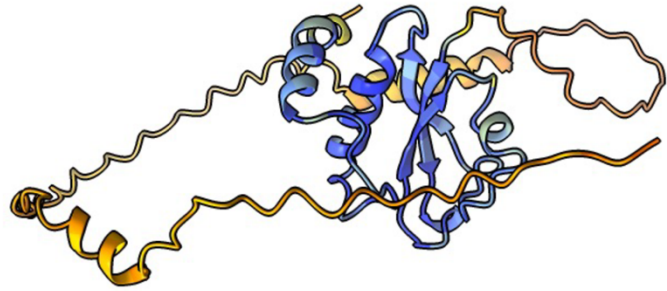>90  <50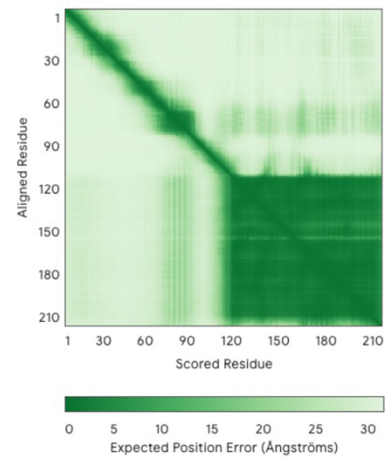

**Figure S7 | Structural prediction of RtnC1 C-terminal domain. a** Prediction of RtnC1-C-terminal toxin domain coloured by confidence. **b** Prediction of entire autoproteolytically cleaved C-terminus coloured by confidence. Predicted Local Distance Difference Test graphs for the AF3 models are provided on the right.

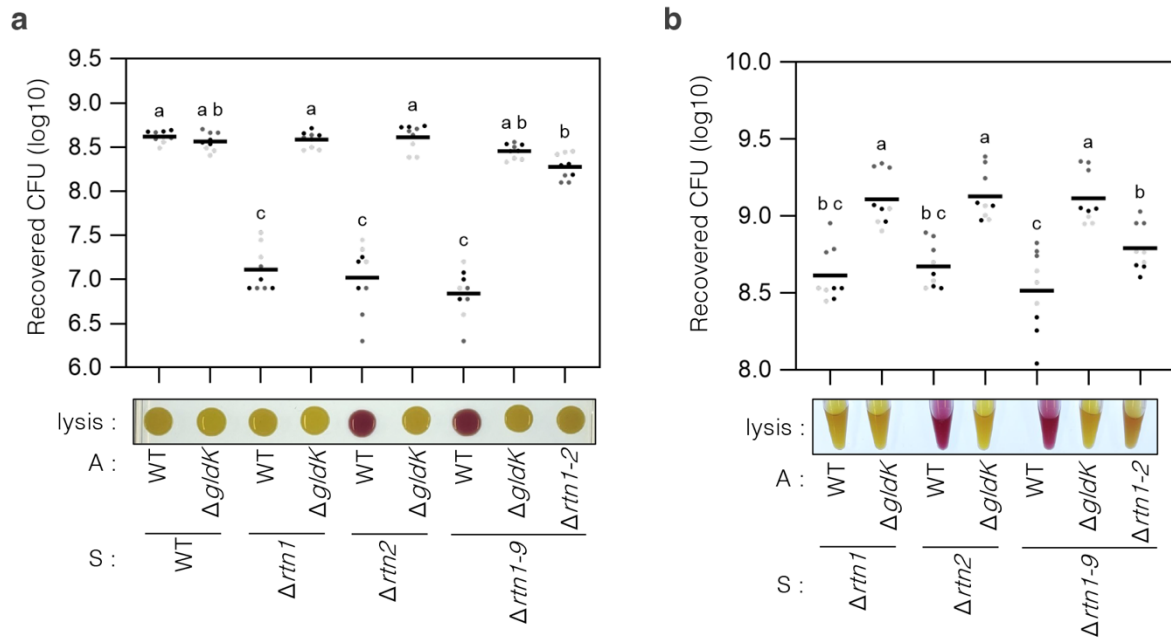

**Figure S8 | T9-dependant killing by Rtn1 and Rtn2 toxins on solid agar media and in liquid co-cultures with sensitive strains.** **a** *C. nematophagum* WT or *rtn* loci mutant strains sensitive (S) to specific toxin attacks due to missing immunity protein were challenged by WT attacker (A) strain, or T9SS-deficient mutant ( $\Delta gldK$ ) or mutant lacking two first *rtn* loci ( $\Delta rtn1-2$ ) on solid media or **b**, in liquid culture. CmR marker carrying sensitive strains were recovered and their CFUs were counted by plating on chloramphenicol cultures. Three biological replicates are represented in different shades of grey, with each point in same colour is a technical replicate. Bar represents means of all replicates. Comparison of means was assessed with one-way ordinary ANOVA. No difference in survival was detected between experiments, which is denoted by a same letter group. Difference of survival between groups  $p < 0,0001$ ; except for difference between groups ab versus a, or b in panel a and between group bc versus b, or c in panel b ( $p = 0,01$ ). For lysis experiments, *C. nematophagum* sensitive strains were *lacZ*<sup>+</sup> and their lysis is assessed using CPRG (yellow), which is converted to (purple) by liberated  $\beta$ -Gal.



**Figure S9** | Distribution of *rtn* loci across Bacteroidota genomes. Phylogenetic tree was built using PhyloPhlAn for the 1087 analysed genomes from phylum Bacteroidota. Genome identifiers are provided on the right side. Heatmap representing number of *rtn* loci detected in genomes and presence of T9SS and T6SSiii are indicated along the species names. Clades from taxa without *rtn* loci were collapsed (number of genomes in collapsed subtrees is indicated), with exception of the class of Bacteroidia which was collapsed despite containing one genome with a Rtn locus. The tree was rooted with the Cytophagia clade. Red circles indicate branches with a UF-boot support above 95%. The length of branches is expressed in substitutions per site.

**Table S1 | T9SS-dependant Rtn proteins identified by label-free mass spectrometry in culture supernatant of *C. nematophagum* JUb275.** Tsc indicates total spectrum count, which is the total number of tandem mass (MS/MS) spectra identified for a specific protein.

| GenBank accession number | Name   | TSC | WT/ $\Delta$ <i>glgK</i> |          | Mol. Weight (kDa) | Sequence coverage (%) |
|--------------------------|--------|-----|--------------------------|----------|-------------------|-----------------------|
|                          |        |     | Ratio                    | p-value  |                   |                       |
| A0A3M7L8L5               | RtnA1  | 28  | 2,74                     | 0,017888 | 57,5              | 12,2                  |
| A0A3M7L862               | RtnB1  | 347 | 16,68                    | 4,6E-07  | 114,8             | 78                    |
| A0A3M7L9P9               | RtnC1  | 642 | 15,34                    | 2,03E-05 | 124               | 78,33                 |
| A0A3M7LFP1               | RtnA2  | /   | /                        | /        | 57,2              | /                     |
| A0A3M7LE61               | RtnB2  | 10  | 1024                     | 0,000736 | 121,7             | 6,63                  |
| A0A3M7LE95               | RtnC2  | 181 | 13,18                    | 9,65E-06 | 127,6             | 41                    |
| A0A3M7LDK1               | RtnA3  | 8   | 5,07                     | 0,028737 | 56,9              | 3,1                   |
| A0A3M7LE58               | RtnB3  | 3   | 1,54                     | 0,725515 | 90,4              | 3,26                  |
| A0A3M7LGW4               | RtnC3  | 53  | 1024                     | 0,000775 | 130,5             | 14                    |
| A0A3M7LCA9               | RtnA4  | /   | /                        | /        | 56,9              | /                     |
| A0A3M7LCD3               | RtnB4  | 23  | 1024                     | 0,012609 | 127,5             | 21,33                 |
| A0A3M7LFC8               | RtnC4  | 2   | 1024                     | 2,71E-07 | 130,5             | 2,7                   |
| A0A3M7LA42               | RtnA5  | /   | /                        | /        | 57,1              | /                     |
| A0A3M7LBP5               | RtnB5  | 24  | 1024                     | 3,18E-05 | 126,4             | 6,9                   |
| A0A3M7LCB2               | RtnC5  | 99  | 16,75                    | 0,000168 | 129,6             | 20,33                 |
| A0A3M7L8Y9               | RtnA6  | 2   | 1024                     | 0,188761 | 57,1              | 5,1                   |
| A0A3M7L7E0               | RtnB6  | 161 | 15,93                    | 1,2E-05  | 114,4             | 78                    |
| A0A3M7L763               | RtnC6  | 170 | 11,95                    | 3,94E-06 | 127,9             | 30                    |
| A0A3M7LC12               | RtnA7  | 12  | 1024                     | 7,94E-05 | 57,9              | 8,73                  |
| A0A3M7L9Q1               | RtnB7  | /   | /                        | /        | 142,8             | /                     |
| A0A3M7LBS3               | RtnC7  | /   | /                        | /        | 135,7             | /                     |
| A0A3M7L7I6               | RtnA8  | /   | /                        | /        | 12,1              | /                     |
| A0A3M7LB16               | RtnB8  | 17  | 1024                     | 0,00014  | 115               | 9,87                  |
| A0A3M7L7K2               | RtnC8  | 94  | 15,99                    | 4,74E-06 | 125,1             | 17,33                 |
| A0A3M7LDD8               | RtnA9  | 7   | 0,81                     | 0,128602 | 17,4              | 18                    |
| A0A3M7LBY0               | RtnBC9 | 115 | 3,02                     | 0,000399 | 237,1             | 39,33                 |

**Table S2 | Bacterial strains used in this study.**

| Strain                          | Description                                                                         | Culture   | Reference                            |
|---------------------------------|-------------------------------------------------------------------------------------|-----------|--------------------------------------|
| <i>E. coli</i> BL21             | For production of recombinant proteins                                              | LB, 37°C  | NEB #C2530H                          |
| <i>E. coli</i> DH5α             | For toxicity assays                                                                 | LB, 37°C  | NEB #C2987H                          |
| <i>E. coli</i> NEB10β           | For cloning                                                                         | LB, 37°C  | NEB #C3019H                          |
| <i>E. coli</i> S17              | For conjugation of pYT313                                                           | LB, 37°C  | Fisher Scientific #NC1526716         |
| <i>E. coli</i> MG1655           | WT strain, for killing assays                                                       | LB, 37°C  | Laboratory collection                |
| <i>C. nematophagum</i> JUb275   | WT strain                                                                           | CYE, 30°C | Page et al. <sup>1</sup>             |
| <i>C. nematophagum</i> JUb129   | WT strain, for killing assays                                                       | CYE, 30°C | Page et al. <sup>1</sup>             |
| <i>C. indologenes</i> ATCC29897 | WT strain, for killing assays                                                       | CYE, 37°C | BCCM/LMG Bacteria Collection LMG8337 |
| <i>F. johnsoniae</i> CJ1827     | Streptomycin-resistant rpsL2 derivative of ATCC 17061 (UW101) for killing assays    | CYE, 30°C | Rhodes et al <sup>2</sup>            |
| JUb275 $\Delta$ gldK            | <i>C. nematophagum</i> JUb275 deleted for the T9SS protein GldK                     | CYE, 30°C | This study                           |
| JUb275 $\Delta$ rtn1            | <i>C. nematophagum</i> JUb275 deleted for Rtn1 locus (Rtn1 sensitive)               | CYE, 30°C | This study                           |
| JUb275 $\Delta$ rtn2            | <i>C. nematophagum</i> JUb275 deleted for Rtn2 locus (Rtn2 sensitive)               | CYE, 30°C | This study                           |
| JUb275 $\Delta$ rtn3            | <i>C. nematophagum</i> JUb275 deleted for Rtn3 locus (Rtn3 sensitive)               | CYE, 30°C | This study                           |
| JUb275 $\Delta$ rtn4            | <i>C. nematophagum</i> JUb275 deleted for Rtn4 locus (Rtn4 sensitive)               | CYE, 30°C | This study                           |
| JUb275 $\Delta$ rtn5            | <i>C. nematophagum</i> JUb275 deleted for Rtn5 locus (Rtn5 sensitive)               | CYE, 30°C | This study                           |
| JUb275 $\Delta$ rtn6            | <i>C. nematophagum</i> JUb275 deleted for Rtn6 locus (Rtn6 sensitive)               | CYE, 30°C | This study                           |
| JUb275 $\Delta$ rtn7            | <i>C. nematophagum</i> JUb275 deleted for Rtn7 locus (Rtn7 sensitive)               | CYE, 30°C | This study                           |
| JUb275 $\Delta$ rtn8            | <i>C. nematophagum</i> JUb275 deleted for Rtn8 locus (Rtn8 sensitive)               | CYE, 30°C | This study                           |
| JUb275 $\Delta$ rtn9            | <i>C. nematophagum</i> JUb275 deleted for Rtn9 locus (Rtn9 sensitive)               | CYE, 30°C | This study                           |
| JUb275 $\Delta$ rtn1-2          | <i>C. nematophagum</i> JUb275 deleted for Rtn1 and Rtn2 loci (Rtn1 and 2 sensitive) | CYE, 30°C | This study                           |

|                                                            |                                                                                                       |                |            |
|------------------------------------------------------------|-------------------------------------------------------------------------------------------------------|----------------|------------|
| JUb275 $\Delta rtn1-9$                                     | <i>C. nematophagum</i> JUb275 deleted for all the 9 <i>rtn</i> loci (Rtn1 to 9 sensitive)             | CYE, 30°C      | This study |
| JUb275 <i>site1:lacZ</i>                                   | JUb275 with <i>lacZ</i> inserted at site 1                                                            | CYE, 30°C      | This study |
| JUb275 $\Delta rtn1$ <i>site1:lacZ</i>                     | JUb275 $\Delta rtn1$ with <i>lacZ</i> inserted at site 1                                              | CYE, 30°C      | This study |
| JUb275 $\Delta rtn2$ <i>site1:lacZ</i>                     | JUb275 $\Delta rtn2$ with <i>lacZ</i> inserted at site 1                                              | CYE, 30°C      | This study |
| JUb275 $\Delta rtn3$ <i>site1:lacZ</i>                     | JUb275 $\Delta rtn3$ with <i>lacZ</i> inserted at site 1                                              | CYE, 30°C      | This study |
| JUb275 $\Delta rtn4$ <i>site1:lacZ</i>                     | JUb275 $\Delta rtn4$ with <i>lacZ</i> inserted at site 1                                              | CYE, 30°C      | This study |
| JUb275 $\Delta rtn5$ <i>site1:lacZ</i>                     | JUb275 $\Delta rtn5$ with <i>lacZ</i> inserted at site 1                                              | CYE, 30°C      | This study |
| JUb275 $\Delta rtn6$ <i>site1:lacZ</i>                     | JUb275 $\Delta rtn6$ with <i>lacZ</i> inserted at site 1                                              | CYE, 30°C      | This study |
| JUb275 $\Delta rtn7$ <i>site1:lacZ</i>                     | JUb275 $\Delta rtn7$ with <i>lacZ</i> inserted at site 1                                              | CYE, 30°C      | This study |
| JUb275 $\Delta rtn8$ <i>site1:lacZ</i>                     | JUb275 $\Delta rtn8$ with <i>lacZ</i> inserted at site 1                                              | CYE, 30°C      | This study |
| JUb275 $\Delta rtn9$ <i>site1:lacZ</i>                     | JUb275 $\Delta rtn9$ with <i>lacZ</i> inserted at site 1                                              | CYE, 30°C      | This study |
| JUb275 $\Delta rtn1-9$ <i>site1:lacZ</i>                   | JUb275 $\Delta rtn1-9$ with <i>lacZ</i> inserted at site 1                                            | CYE, 30°C      | This study |
| JUb275 <i>site1:cmR</i>                                    | JUb275 with <i>cmR</i> inserted at site 1                                                             | CYE, 30°C, Cml | This study |
| JUb275 $\Delta rtn1$ <i>site1:cmR</i>                      | JUb275 $\Delta rtn1$ with <i>cmR</i> inserted at site 1                                               | CYE, 30°C, Cml | This study |
| JUb275 $\Delta rtn2$ <i>site1:cmR</i>                      | JUb275 $\Delta rtn2$ with <i>cmR</i> inserted at site 1                                               | CYE, 30°C, Cml | This study |
| JUb275 $\Delta rtn3$ <i>site1:cmR</i>                      | JUb275 $\Delta rtn3$ with <i>cmR</i> inserted at site 1                                               | CYE, 30°C, Cml | This study |
| JUb275 $\Delta rtn4$ <i>site1:cmR</i>                      | JUb275 $\Delta rtn4$ with <i>cmR</i> inserted at site 1                                               | CYE, 30°C, Cml | This study |
| JUb275 $\Delta rtn5$ <i>site1:cmR</i>                      | JUb275 $\Delta rtn5$ with <i>cmR</i> inserted at site 1                                               | CYE, 30°C, Cml | This study |
| JUb275 $\Delta rtn6$ <i>site1:cmR</i>                      | JUb275 $\Delta rtn6$ with <i>cmR</i> inserted at site 1                                               | CYE, 30°C, Cml | This study |
| JUb275 $\Delta rtn7$ <i>site1:cmR</i>                      | JUb275 $\Delta rtn7$ with <i>cmR</i> inserted at site 1                                               | CYE, 30°C, Cml | This study |
| JUb275 $\Delta rtn8$ <i>site1:cmR</i>                      | JUb275 $\Delta rtn8$ with <i>cmR</i> inserted at site 1                                               | CYE, 30°C, Cml | This study |
| JUb275 $\Delta rtn9$ <i>site1:cmR</i>                      | JUb275 $\Delta rtn9$ with <i>cmR</i> inserted at site 1                                               | CYE, 30°C, Cml | This study |
| JUb275 $\Delta rtn1-9$ <i>site1:cmR</i>                    | JUb275 $\Delta rtn1-9$ with <i>cmR</i> inserted at site 1                                             | CYE, 30°C, Cml | This study |
| JUb275 $\Delta rtn1$ <i>site1:lacZ</i> , <i>site2:rtn1</i> | JUb275 $\Delta rtn1$ <i>site1:lacZ</i> complemented with the immunity protein Rtn1 sequence at site 2 | CYE, 30°C      | This study |
| JUb275 $\Delta rtnA1$                                      | JUb275 deleted for <i>rtnA1</i> sequence                                                              | CYE, 30°C      | This study |
| JUb275 $\Delta rtnA1-rtnA2$                                | JUb275 deleted for <i>rtnA1</i> and <i>rtnA2</i> sequences                                            | CYE, 30°C      | This study |
| JUb275 <i>rtnA1</i> <sup>CTD</sup>                         | JUb275 with <i>rtnA1</i> deleted for the CTD sequence                                                 | CYE, 30°C      | This study |
| JUb275 <i>rtnC1</i> $\Delta$ Ct1                           | JUb275 with RtnC1 deleted for the C-terminal nuclease domain sequence                                 | CYE, 30°C      | This study |
| JUb275 $\Delta tssBC$                                      | JUb275 deleted for <i>tssB</i> and <i>tssC</i> T6SS genes                                             | CYE, 30°C      | This study |
| JUb275 $\Delta porZ$                                       | JUb275 deleted for <i>porZ</i> coding sequence                                                        | CYE, 30°C      | This study |
| JUb275 <i>rtnC1</i> <sub>D879N</sub>                       | JUb275 with a point mutation on RtnC1 D879N                                                           | CYE, 30°C      | This study |

|                                                        |                                                                          |                |            |
|--------------------------------------------------------|--------------------------------------------------------------------------|----------------|------------|
| JUb275 <i>site1:mLytchee</i>                           | JUb275 with <i>mLytchee</i> inserted at site 1                           | CYE, 30°C      | This study |
| JUb275 <i>site1:mChartreuse</i>                        | JUb275 with <i>mChartreuse</i> inserted at site 1                        | CYE, 30°C      | This study |
| JUb275 $\Delta$ <i>rtn1</i> <i>site1:mChartreuse</i>   | JUb275 $\Delta$ <i>rtn1</i> with <i>mChartreuse</i> inserted at site 1   | CYE, 30°C      | This study |
| JUb275 $\Delta$ <i>rtn2</i> <i>site1:mChartreuse</i>   | JUb275 $\Delta$ <i>rtn2</i> with <i>mChartreuse</i> inserted at site 1   | CYE, 30°C      | This study |
| JUb275 $\Delta$ <i>rtn1-9</i> <i>site1:mChartreuse</i> | JUb275 $\Delta$ <i>rtn1-9</i> with <i>mChartreuse</i> inserted at site 1 | CYE, 30°C      | This study |
| JUb275 $\Delta$ <i>gldK</i> <i>site1:mChartreuse</i>   | JUb275 $\Delta$ <i>gldK</i> with <i>mChartreuse</i> inserted at site 1   | CYE, 30°C      | This study |
| JUb129 <i>site1:cmR</i>                                | JUb129 with <i>cmR</i> inserted at site 1                                | CYE, 30°C, Cml | This study |
| JUb129 <i>site1:mlytchee</i>                           | JUb129 with <i>mLytchee</i> inserted at site 1                           | CYE, 30°C      | This study |

**Table S3 | Plasmids used in this study**

| Plasmid                         | Application                                                                                                       | Resistance                                            | Reference                  |
|---------------------------------|-------------------------------------------------------------------------------------------------------------------|-------------------------------------------------------|----------------------------|
| pBAD33                          | Arabinose-inducible vector                                                                                        | Cml                                                   | Guzman et al <sup>3</sup>  |
| pCDF-Duet                       | IPTG-inducible vector                                                                                             | Sm                                                    | Novagen                    |
| pRSF-Duet                       | IPTG-inducible vector                                                                                             | Km                                                    | Novagen                    |
| pACYC-Duet                      | IPTG-inducible vector                                                                                             | Cml                                                   | Novagen                    |
| pYT313                          | Suicide vector for chromosome mutagenesis in <i>C. nematophagum</i>                                               | Ap ( <i>E. coli</i> ), Ery ( <i>C. nematophagum</i> ) | Zhu et al <sup>4</sup>     |
| pCP23                           | Confers tetracycline resistance to <i>F. johnsoniae</i>                                                           | Tc                                                    | Agarwal et al <sup>5</sup> |
| pYT313 <i>site1:lacZ</i>        | Insertion of <i>lacZ</i> gene in <i>C. nematophagum</i> JUb275 chromosome at site 1                               | Ap ( <i>E. c.</i> ), Ery ( <i>C. n.</i> )             | This study                 |
| pYT313 <i>site1:cmR</i>         | Insertion of <i>cmR</i> gene for chloramphenicol resistance in <i>C. nematophagum</i> JUb275 chromosome at site 1 | Ap ( <i>E. c.</i> ), Ery ( <i>C. n.</i> )             | This study                 |
| pYT313 <i>site1:mChartreuse</i> | For insertion of <i>mLytchee</i> in <i>C. nematophagum</i> JUb275 at site 1                                       | Ap ( <i>E. c.</i> ), Ery ( <i>C. n.</i> )             | This study                 |
| pYT313 <i>site1:mLytchee</i>    | For insertion of <i>mLytchee</i> in <i>C. nematophagum</i> JUb275 at site 1                                       | Ap ( <i>E. c.</i> ), Ery ( <i>C. n.</i> )             | This study                 |
| pYT313 $\Delta$ <i>gldK</i>     | Deletion of <i>gldK</i> sequence                                                                                  | Ap ( <i>E. c.</i> ), Ery ( <i>C. n.</i> )             | This study                 |
| pYT313 $\Delta$ <i>rtn1</i>     | Deletion of <i>rtn1</i> locus                                                                                     | Ap ( <i>E. c.</i> ), Ery ( <i>C. n.</i> )             | This study                 |
| pYT313 $\Delta$ <i>rtn2</i>     | Deletion of <i>rtn2</i> locus                                                                                     | Ap ( <i>E. c.</i> ), Ery ( <i>C. n.</i> )             | This study                 |
| pYT313 $\Delta$ <i>rtn3</i>     | Deletion of <i>rtn3</i> locus                                                                                     | Ap ( <i>E. c.</i> ), Ery ( <i>C. n.</i> )             | This study                 |
| pYT313 $\Delta$ <i>rtn4</i>     | Deletion of <i>rtn4</i> locus                                                                                     | Ap ( <i>E. c.</i> ), Ery ( <i>C. n.</i> )             | This study                 |
| pYT313 $\Delta$ <i>rtn5</i>     | Deletion of <i>rtn5</i> locus                                                                                     | Ap ( <i>E. c.</i> ), Ery ( <i>C. n.</i> )             | This study                 |

|                                             |                                                                                                                                                                                                    |                                                       |            |
|---------------------------------------------|----------------------------------------------------------------------------------------------------------------------------------------------------------------------------------------------------|-------------------------------------------------------|------------|
| pYT313 $\Delta rtn6$                        | Deletion of <i>rtn6</i> locus                                                                                                                                                                      | Ap ( <i>E. coli</i> ), Ery ( <i>C. nematophagum</i> ) | This study |
| pYT313 $\Delta rtn7$                        | Deletion of <i>rtn7</i> locus                                                                                                                                                                      | Ap ( <i>E. coli</i> ), Ery ( <i>C. nematophagum</i> ) | This study |
| pYT313 $\Delta rtn8$                        | Deletion of <i>rtn8</i> locus                                                                                                                                                                      | Ap ( <i>E. coli</i> ), Ery ( <i>C. nematophagum</i> ) | This study |
| pYT313 $\Delta rtn9$                        | Deletion of <i>rtn9</i> locus                                                                                                                                                                      | Ap ( <i>E. coli</i> ), Ery ( <i>C. nematophagum</i> ) | This study |
| pYT313 <i>site2:rtn1</i>                    | Complementation of immunity <i>rtn1</i> gene in <i>C. nematophagum</i> chromosome at site 2                                                                                                        | Ap ( <i>E. coli</i> ), Ery ( <i>C. nematophagum</i> ) | This study |
| pYT313 $\Delta rtnA1$                       | Deletion of <i>rtnA1</i> sequence                                                                                                                                                                  | Ap ( <i>E. coli</i> ), Ery ( <i>C. nematophagum</i> ) | This study |
| pYT313 <i>rtnA1</i> <sup>CTD</sup>          | Deletion of <i>rtnA1</i> CTD sequence                                                                                                                                                              | Ap ( <i>E. coli</i> ), Ery ( <i>C. nematophagum</i> ) | This study |
| pYT313 <i>rtnC1</i> $\Delta$ Ct1            | Deletion of <i>rtnC1</i> C-terminal nuclease domain sequence                                                                                                                                       | Ap ( <i>E. coli</i> ), Ery ( <i>C. nematophagum</i> ) | This study |
| pYT313 $\Delta rtnA2$                       | Deletion of <i>rtnA2</i> sequence                                                                                                                                                                  | Ap ( <i>E. coli</i> ), Ery ( <i>C. nematophagum</i> ) | This study |
| pYT313 $\Delta tssB$ -C                     | Deletion of <i>tssB</i> and <i>tssC</i> sequences                                                                                                                                                  | Ap ( <i>E. coli</i> ), Ery ( <i>C. nematophagum</i> ) | This study |
| pYT313 $\Delta porZ$                        | Deletion of <i>porZ</i> sequence                                                                                                                                                                   | Ap ( <i>E. coli</i> ), Ery ( <i>C. nematophagum</i> ) | This study |
| pYT313 <i>rtnC1</i> <sub>D879N</sub>        | For point mutation on <i>rtnC1</i> D879N                                                                                                                                                           | Ap ( <i>E. coli</i> ), Ery ( <i>C. nematophagum</i> ) | This study |
| pYT313 JUb129- <i>site1:cmR</i>             | For insertion of <i>cmR</i> in JUb129 at site 1                                                                                                                                                    | Ap ( <i>E. coli</i> ), Ery ( <i>C. nematophagum</i> ) | This study |
| pYT313 JUb129- <i>site1:mLytchee</i>        | For insertion of <i>mLytchee</i> in JUb129 at site 1                                                                                                                                               | Ap ( <i>E. coli</i> ), Ery ( <i>C. nematophagum</i> ) | This study |
| pRSF-Duet pelB-RtnB1-Flag                   | IPTG-inducible expression vector for Flag-tagged RtnB1 protein expression in <i>E. coli</i> periplasm with a <i>pelB</i> signal peptide from <i>E. coli</i>                                        | Km                                                    | This study |
| pRSF-Duet pelB-RtnB1-Strep                  | IPTG-inducible expression vector for Strep-tagged RtnB1 protein expression in <i>E. coli</i> periplasm with a <i>pelB</i> signal peptide from <i>E. coli</i>                                       | Km                                                    | This study |
| pCDF-Duet pelB-RtnC1-Flag                   | IPTG-inducible expression vector for Flag-tagged RtnC1 protein expression in <i>E. coli</i> periplasm with a <i>pelB</i> signal peptide from <i>E. coli</i>                                        | Sm                                                    | This study |
| pCDF-Duet pelB-RtnC1 <sup>D879N</sup> -Flag | IPTG-inducible expression vector for Flag-tagged RtnC1 protein expression with a point mutation on aspartate 879 in <i>E. coli</i> periplasm with a <i>pelB</i> signal peptide from <i>E. coli</i> | Sm                                                    | This study |
| pACYC-Duet pelB-RtnA1-Flag                  | IPTG-inducible expression vector for Flag-tagged RtnA1 protein expression in <i>E. coli</i> periplasm with a <i>pelB</i> signal peptide from <i>E. coli</i>                                        | Cml                                                   | This study |
| pACYC-Duet pelB-RtnA1-Strep                 | IPTG-inducible expression vector for Strep-tagged RtnA1 protein expression in <i>E. coli</i> periplasm with a <i>pelB</i> signal peptide from <i>E. coli</i>                                       | Cml                                                   | This study |
| pACYC-Duet pelB-RtnA1 $\Delta$ CTD-Strep    | IPTG-inducible expression vector for Strep-tagged RtnA1 protein expression with no CTD                                                                                                             | Cml                                                   | This study |

|                                         |                                                                                                                                                                                   |     |            |
|-----------------------------------------|-----------------------------------------------------------------------------------------------------------------------------------------------------------------------------------|-----|------------|
|                                         | sequence in <i>E. coli</i> periplasm with a <i>pelB</i> signal peptide from <i>E. coli</i>                                                                                        |     |            |
| pACYC-Duet <i>pelB</i> -RtnA2ΔCTD-Strep | IPTG-inducible expression vector for Strep-tagged RtnA2 protein expression with no CTD sequence in <i>E. coli</i> periplasm with a <i>pelB</i> signal peptide from <i>E. coli</i> | Cml | This study |
| pBAD33 Cyto-Ct1                         | pBAD33 with arabinose-inducible expression of toxic C-terminal domain of Rtn1 (Cyto-Ct1)                                                                                          | Cml | This study |
| pBAD33 Cyto-Ct1 <sub>Y7A</sub>          | pBAD33 with arabinose-inducible expression of toxic C-terminal domain of Rtn1 with a catalytic point mutation (Cyto-Ct1 <sub>Y7A</sub> )                                          | Cml | This study |
| pBAD33 Cyto-Ct1 <sub>Y20A</sub>         | pBAD33 with arabinose-inducible expression of toxic C-terminal domain of Rtn1 with a catalytic point mutation (Cyto-Ct1 <sub>Y20A</sub> )                                         | Cml | This study |
| pBAD33 Cyto-Ct2                         | pBAD33 with arabinose-inducible expression of toxic C-terminal domain of Rtn2 (Cyto-Ct2)                                                                                          | Cml | This study |
| pBAD33 Peri-Ct2                         | pBAD33 with arabinose-inducible expression of toxic C-terminal domain of Rtn2 with a <i>torA</i> -signal peptide for periplasmic translocation (Peri-Ct2)                         | Cml | This study |
| pBAD33 Cyto-Ct3                         | pBAD33 with arabinose-inducible expression of toxic C-terminal domain of Rtn3 (Cyto-Ct3)                                                                                          | Cml | This study |
| pBAD33 Peri-Ct3                         | pBAD33 with arabinose-inducible expression of toxic C-terminal domain of Rtn3 with a <i>torA</i> -signal peptide for periplasmic translocation (Peri-Ct3)                         | Cml | This study |
| pBAD33 Cyto-Ct4                         | pBAD33 with arabinose-inducible expression of toxic C-terminal domain of Rtn4 (Cyto-Ct4)                                                                                          | Cml | This study |
| pBAD33 Peri-Ct4                         | pBAD33 with arabinose-inducible expression of toxic C-terminal domain of Rtn4 with a <i>torA</i> -signal peptide for periplasmic translocation (Peri-Ct4)                         | Cml | This study |
| pBAD33 Cyto-Ct5                         | pBAD33 with arabinose-inducible expression of toxic C-terminal domain of Rtn5 (Cyto-Ct5)                                                                                          | Cml | This study |
| pBAD33 Peri-Ct5                         | pBAD33 with arabinose-inducible expression of toxic C-terminal domain of Rtn5 with a <i>torA</i> -signal peptide for periplasmic translocation (Peri-Ct5)                         | Cml | This study |
| pBAD33 Cyto-Ct6                         | pBAD33 with arabinose-inducible expression of toxic C-terminal domain of Rtn6 (Cyto-Ct6)                                                                                          | Cml | This study |
| pBAD33 Peri-Ct6                         | pBAD33 with arabinose-inducible expression of toxic C-terminal domain of Rtn6 with a <i>torA</i> -signal peptide for periplasmic translocation (Peri-Ct6)                         | Cml | This study |
| pBAD33 Cyto-Ct7                         | pBAD33 with arabinose-inducible expression of toxic C-terminal domain of Rtn7 (Cyto-Ct7)                                                                                          | Cml | This study |

|                 |                                                                                                                                                           |     |            |
|-----------------|-----------------------------------------------------------------------------------------------------------------------------------------------------------|-----|------------|
| pBAD33 Peri-Ct7 | pBAD33 with arabinose-inducible expression of toxic C-terminal domain of Rtn7 with a <i>torA</i> -signal peptide for periplasmic translocation (Peri-Ct7) | Cml | This study |
| pBAD33 Cyto-Ct8 | pBAD33 with arabinose-inducible expression of toxic C-terminal domain of Rtn8 (Cyto-Ct8)                                                                  | Cml | This study |
| pBAD33 Peri-Ct8 | pBAD33 with arabinose-inducible expression of toxic C-terminal domain of Rtn8 with a <i>torA</i> -signal peptide for periplasmic translocation (Peri-Ct8) | Cml | This study |
| pBAD33 Cyto-Ct9 | pBAD33 with arabinose-inducible expression of toxic C-terminal domain of Rtn9 (Cyto-Ct9)                                                                  | Cml | This study |
| pBAD33 Peri-Ct9 | pBAD33 with arabinose-inducible expression of toxic C-terminal domain of Rtn9 with a <i>torA</i> -signal peptide for periplasmic translocation (Peri-Ct9) | Cml | This study |

**Table S4 | DNA oligos used in this study.** In the column describing the purpose, RL stands for oligos used for restriction-ligation cloning, GA – Gibson assembly and SLIC - sequence and ligation independent cloning.

| Primer        | Sequence                                                    | Purpose                          |
|---------------|-------------------------------------------------------------|----------------------------------|
| F-pYT-open    | GCATGCAAGCTTGGCGTAAT                                        | (GA) pYT313 mutagenesis plasmids |
| R-pYT-open    | TCTAGAGGATCCCCGAATT                                         | (GA)pYT313 mutagenesis plasmids  |
| F-up-d1-rtn   | GGAAAAATTCGGGGGATCCTCTAGAATACAAAATTGATCTTGA<br>AAGAAGG      | (GA) pYT313- $\Delta$ rtn1       |
| R-up-d1-rtn   | CTGACATTCAAATATTATAAAGATTATTGTTTTATTTTTAGTTG<br>GAACCTAA    | (GA) pYT313- $\Delta$ rtn1       |
| F-down-d1-rtn | TAAGTTCCAAACTAAAAATAAAACAATAATCTTTATAATATT<br>GAATGTCAGT    | (GA) pYT313- $\Delta$ rtn1       |
| R-down-d1-rtn | CCATGATTACGCCAAGCTTGCATGCCCTTATTATCTACAGAT<br>ACAGCAA       | (GA) pYT313- $\Delta$ rtn1       |
| F-verif1-rtn  | AATCTCATGTGCAGGAATTTTAAC                                    | verification of $\Delta$ rtn1    |
| R-verif1-rtn  | AGTTGCTTTTAGGGTAAACTGAA                                     | verification of $\Delta$ rtn1    |
| F-up-d2-rtn   | GGAAAAATTCGGGGGATCCTCTAGAACTAAATTTATTTAGTTA<br>AATTTATTACGG | (GA) pYT313- $\Delta$ rtn2       |
| R-up-d2-rtn   | TAGGAGATTCTCAGAGCATTAGTTTACCTTGTAATGCTTTTTATT<br>AGATGGTCG  | (GA) pYT313- $\Delta$ rtn2       |
| F-down-d2-rtn | TTTTTGCGACCATCTAATAAAAAGCATTACAAGGTAACTAATG<br>CTCTGAGAA    | (GA) pYT313- $\Delta$ rtn2       |

|                |                                                            |                               |
|----------------|------------------------------------------------------------|-------------------------------|
| R-down-d2-rtn  | CCATGATTACGCCAAGCTTGCATGCATGCTTAGAACTCCATG<br>AGAAATTA     | (GA) pYT313- $\Delta$ rtn2    |
| F-verif2-rtn   | TTCCATAAATGAGGCCGAACTA                                     | verification of $\Delta$ rtn2 |
| R-verif2-rtn   | CTCCAAAATCCTCGACATCCAA                                     | verification of $\Delta$ rtn2 |
| F-up-d3-rtn    | GGAAAAATTCGGGGGATCCTCTAGAAATATCTTCCAGCTCTT<br>CCAAT        | (GA) pYT313- $\Delta$ rtn3    |
| R-up-d3-rtn    | ATAGGAGACAATTTTTCTAGGAAGTGGATTCAATTGTGTTTTAA<br>TTTAAAGCG  | (GA) pYT313- $\Delta$ rtn3    |
| F-down-d3-rtn  | GCACGCTTTTAAATTAACACAATTGAATCCACTCCTAGAA<br>AAAATTGTC      | (GA) pYT313- $\Delta$ rtn3    |
| R-down-d3-rtn  | CCATGATTACGCCAAGCTTGCATGCACTCCACCATCTGTTAT<br>AGTGAT       | (GA) pYT313- $\Delta$ rtn3    |
| F-verif3-rtn   | AAATTATGCCTTCCGAAAGGT                                      | verification of $\Delta$ rtn3 |
| R-verif3-rtn   | AGCGTACATTTCTAAATGGTC                                      | verification of $\Delta$ rtn3 |
| F-up-d4-rtn    | GGAAAAATTCGGGGGATCCTCTAGATATTAGCTAAGTTAAGTG<br>TTAATTTTT   | (GA) pYT313- $\Delta$ rtn4    |
| R-up-d4-rtn    | AAGTTTTTCAAAAAATAAGTTTTAATTCTTAGTGATAAAATGGT<br>TTTAGTATT  | (GA) pYT313- $\Delta$ rtn4    |
| F-down-d4-rtn  | AATACTAAAACCATTTTATACACTAAGAATTAACCTTATTTTTTG<br>AAAAAACTT | (GA) pYT313- $\Delta$ rtn4    |
| R-down-d4-rtn  | CCATGATTACGCCAAGCTTGCATGCCGCTCCATAATCATACA<br>TCCCT        | (GA) pYT313- $\Delta$ rtn4    |
| F-verif-d4-rtn | CCCAACACAAAAAGCAAATTAC                                     | verification of $\Delta$ rtn4 |
| R-verif-d4-rtn | TCGGATTATGAGCCATACTGTAAA                                   | verification of $\Delta$ rtn4 |
| F-up-d5-rtn    | GGAAAAATTCGGGGGATCCTCTAGATATTTATGTAAGGAAA<br>TCATGAGTATTA  | (GA) pYT313- $\Delta$ rtn5    |
| R-up-d5-rtn    | AATGGTGACTTTTTTATTAGGTTAATCAATTGTGTTTTAATTTTAAA<br>TTTTGTG | (GA) pYT313- $\Delta$ rtn5    |
| F-down-d5-rtn  | AAATTTAAATTAACACAATTGATTAACCTAATAAAAAAGTCA<br>CCATTTT      | (GA) pYT313- $\Delta$ rtn5    |
| R-down-d5-rtn  | CCATGATTACGCCAAGCTTGCATGCTTAAGTATTGGTGTAGCT<br>CCTTT       | (GA) pYT313- $\Delta$ rtn5    |
| F-verif-d5-rtn | GAAGTTGGAGGAATTCAGTATTTTG                                  | verification of $\Delta$ rtn5 |
| R-verif-d5-rtn | GGACAATCAACATTCCGAAAAA                                     | verification of $\Delta$ rtn5 |
| F-up-d6-rtn    | GGAAAAATTCGGGGGATCCTCTAGAACTAAGCTTCAACAAT<br>TTGAG         | (GA) pYT313- $\Delta$ rtn6    |
| R-up-d6-rtn    | CTGCCAAGGGTAGGAGTTTTAATTGTGTTTTATTTTTAGTTGTA<br>TTTAGAAATT | (GA) pYT313- $\Delta$ rtn6    |
| F-down-d6-rtn  | CTAAATACAACATAAAAAATAACACAATTAACCTCCTACCCT<br>TGG          | (GA) pYT313- $\Delta$ rtn6    |

|                 |                                                                |                               |
|-----------------|----------------------------------------------------------------|-------------------------------|
| R-down-d6-rtn   | CCATGATTACGCCAAGCTTGCATGCCGTAGAAGTAATTTATTT<br>TTTTACAGAAT     | (GA) pYT313- $\Delta$ rtn6    |
| F-verif-d6-rtn  | ATATACGTCAAGTTTTGACGCT                                         | verification of $\Delta$ rtn6 |
| R-verif-d6-rtn  | CCTGAAACTTGATTGATAACTCG                                        | verification of $\Delta$ rtn6 |
| F-up-d7-rtn     | GGAAAAATTCGGGGGATCCTCTAGATTTAGGAATTTATTTCTC<br>CTTCCT          | (GA) pYT313- $\Delta$ rtn7    |
| R-up-d7-rtn     | GGTAACTTCTTCTACAATTAATAAATCTTAATGTTTATTTTCGAGT<br>ATTGATTATT   | (GA) pYT313- $\Delta$ rtn7    |
| F-down-d7-rtn   | TCAATACTCGAAATAAACATTAAGATTTATTAATTGTAGAAGAAG<br>TTACCTCA      | (GA) pYT313- $\Delta$ rtn7    |
| R-down-d7-rtn   | CCATGATTACGCCAAGCTTGCATGCTACAGTTGTTTTGGGTAA<br>AGCT            | (GA) pYT313- $\Delta$ rtn7    |
| F-verif-d7-rtn  | GCGACATCATAATAATTGAATTACT                                      | verification of $\Delta$ rtn7 |
| R-verif-d7-rtn  | TGTTTCAAAAAGGGCACTATTTT                                        | verification of $\Delta$ rtn7 |
| F-up-d8-rtn     | GGAAAAATTCGGGGGATCCTCTAGATATTATTGGACGTTCCC<br>AAAATAT          | (GA) pYT313- $\Delta$ rtn8    |
| R-up-d8-rtn     | CCTTCTTCAAAGTATTTCTTATTTTTCAAGTGTGTTTAATTTAAA<br>ATTGTG        | (GA) pYT313- $\Delta$ rtn8    |
| F-down-d8-rtn   | CAATTTTAAATTAACACACTTGAAAAATAAGAAATACTTTGAA<br>GAAGGAT         | (GA) pYT313- $\Delta$ rtn8    |
| R-down-d8-rtn   | CCATGATTACGCCAAGCTTGCATGCTACATCCAACCGGAGA<br>AATAAA            | (GA) pYT313- $\Delta$ rtn8    |
| F-verif-d8-rtn  | GATCGCAAAAGTAATAATTAECTCAC                                     | verification of $\Delta$ rtn8 |
| R-verif-d8-rtn  | GTAGCTCAATCAAGATACTTGAC                                        | verification of $\Delta$ rtn8 |
| F-up-d9-rtn     | GGAAAAATTCGGGGGATCCTCTAGACTGATGCTTATTTTGAC<br>AAAGAAG          | (GA) pYT313- $\Delta$ rtn9    |
| R-up-d9-rtn     | TTAATGTTTTTTTAAATAACAATTACCTCTTGTTAAGTAATTTTATT<br>TAATAATTTGC | (GA) pYT313- $\Delta$ rtn9    |
| F-down-d9-rtn   | CGCAAATTATTAATAAAATTAATAACAAGAGGTAATTGTTATT<br>TAAAAAACATT     | (GA) pYT313- $\Delta$ rtn9    |
| R-down-d9-rtn   | CCATGATTACGCCAAGCTTGCATGCTGATGTTATTTTTGTCTT<br>TTCATAATC       | (GA) pYT313- $\Delta$ rtn9    |
| F-verif-d9-rtn  | CTCATGTGCAGGAATTTTTGTAAAC                                      | verification of $\Delta$ rtn9 |
| R-verif-d9-rtn  | CTGCAAAGGGATTAACAAACTCT                                        | verification of $\Delta$ rtn9 |
| F-up-pYT-d-gldK | TGGTACTCCATGAGTTGCCGGATCCTCTAGAGTCGACCTG                       | (SLIC) pYT313 $\Delta$ gldK   |
| R-up-pYT-d-gldK | GGCTGGTAATATTACATTAACGGATCCCCGAATTTTCCG                        | (SLIC) pYT313 $\Delta$ gldK   |
| F-up-d-gldK     | AGGTCGACTCTAGAGGATCCGGCAACTCATGGAGTACCA                        | (SLIC) pYT313 $\Delta$ gldK   |
| R-up-d-gldK     | AAAAATGTCTAGTTGATATTATCTTTTCATGTTAATTTTATAATT<br>AAG           | (SLIC) pYT313 $\Delta$ gldK   |

|                            |                                                   |                                    |
|----------------------------|---------------------------------------------------|------------------------------------|
| F-down-d-gldK              | TAAAAATTAACATGAAAAGATAATATCAACTAGACAATTTTC        | (SLIC) pYT313 ΔgldK                |
| R-down-d-gldK              | CGGAAAAATTCGGGGGATCCGTTAATGTAATATTACCAGCC         | (SLIC) pYT313 ΔgldK                |
| F-up-pYT-site1:lacZ        | TATATAACTCACATGAAGATTCCGATCCTCTAGAGTCGACC         | (SLIC) pYT313 site1:lacZ           |
| R-up-pYT-site1:lacZ        | ATATAATCAAGTATATTTGCTGCTGGATCCCCCGAATTTTC         | (SLIC) pYT313 site1:lacZ           |
| F-up-site1:lacZ            | TGCAGCGGAAAAATTCGGGGGATCCAGCAGCAAATATACTTG        | (SLIC) pYT313 site1:lacZ           |
| R-up-site1:lacZ            | TTCTTTGGTATGCGCTGCCGAATCAAATAAGTTTAGCTCAC         | (SLIC) pYT313 site1:lacZ           |
| F-down-site1:lacZ          | GGTCTGGTGTCAAAAATAAAGATTACATATTGAATATTTTTTG       | (SLIC) pYT313 site1:lacZ           |
| R-down-site1:lacZ          | CTGCAGGTGCGACTCTAGAGGATCCGAATCTTCATGTGAGTTATATTTG | (SLIC) pYT313 site1:lacZ           |
| F-down-lacZ                | CGTGAGCTAACCTTATTTGATTCGGCAGCGCATACCAAAG          | (SLIC) pYT313 site1:lacZ           |
| R-down-lacZ                | ATAATATTCAATATGTAATCTTTTATTTTGACACCAGACC          | (SLIC) pYT313 site1:lacZ           |
| F-up-pYT-site1:cmR         | AGTGGCAGGGCGGGGCGTAAAAGATTACATATTGAATAT           | (SLIC) pYT313 site1:cmR            |
| R-up-pYT-site1:cmR         | TCCAGTGATTTTTTCTCCATTTTTTAATTACAATTTAG            | (SLIC) pYT313 site1:cmR            |
| F-down-cmR                 | AACTAAATTGTAATTAATAAATGGAGAAAAAATCACTGG           | (SLIC) pYT313 site1:cmR            |
| R-down-cmR                 | TAATATTCAATATGTAATCTTTTACGCCCGCCCTGCCAC           | (SLIC) pYT313 site1:cmR            |
| F-up-pYT-site1:mChartreuse | CATGGATGAGCTCTACAAATAAAGATTACATATTGAATATTATTTTG   | (SLIC) pYT313 site1:mChartreuse    |
| R-up-pYT-site1:mChartreuse | ACAGTCTTCACCTTTAGACATTTTTTAATTACAATTTAGTTAATTAC   | (SLIC) pYT313 site1:mChartreuse    |
| F-down-mChartreuse         | TTAACTAAATTGTAATTAATAAATGTCTAAAGGTGAAGAACTG       | (SLIC) pYT313 site1:mChartreuse    |
| R-down-mChartreuse         | ATAATATTCAATATGTAATCTTTTATTTGTAGAGCTCATCCATG      | (SLIC) pYT313 site1:mChartreuse    |
| F-up-pYT-d-rtnA1           | TTTCATTAAGGTCAACTTTGGATCCTCTAGAGTCGACCTGC         | (SLIC) pYT313 ΔrtnA1               |
| R-up-pYT-d-rtnA1           | CAGAGATTCAAATCCTGCATTGGATCCCCCGAATTTTCCGC         | (SLIC) pYT313 ΔrtnA1               |
| F-up-d-rtnA1               | TGAATATGTTCACTTATATTGTTTTATTTTTTAGTTGG            | (SLIC) pYT313 ΔrtnA1               |
| R-up-d-rtnA1               | TGCAGGTGCGACTCTAGAGGATCCAAAGTTGACCTTAATGAAAGAAGAC | (SLIC) pYT313 ΔrtnA1               |
| F-down-d-rtnA1             | AGCGGAAAAATTCGGGGGATCCAATGCAGGATTTGAATCTCTGG      | (SLIC) pYT313 ΔrtnA1               |
| R-down-d-rtnA1             | TCCAAACTAAAAAATAAAACAATATAAGTATGAACATATTCAAG      | (SLIC) pYT313 ΔrtnA1               |
| F-up-pYT-rtnA1-CTD         | GATAAAAATATTACGTATCCTGGATCCCCCGAATTTTCCGC         | (SLIC) pYT313 rtnA1 <sup>CTD</sup> |

|                    |                                                                  |                                     |
|--------------------|------------------------------------------------------------------|-------------------------------------|
| R-up-pYT-rtnA1-CTD | TATTATAATTCACAGGAGATGTGGATCCTCTAGAGTCGACCTG<br>C                 | (SLIC) pYT313 rtnA1 <sup>-CTD</sup> |
| F-up-rtnA1-CTD     | TGCAGGTCGACTCTAGAGGATCCACATCTCCTGTGAATTATA<br>ATAATAG            | (SLIC) pYT313 rtnA1 <sup>-CTD</sup> |
| R-up-rtnA1-CTD     | GAATATGTTCACTTATATTTATATTAATTGATCAATTTGTTTATC                    | (SLIC) pYT313 rtnA1 <sup>-CTD</sup> |
| F-down-rtnA1-CTD   | GATAAACAAATTGATCAATTAATATAAATAAGTATGAACATAT<br>TC                | (SLIC) pYT313 rtnA1 <sup>-CTD</sup> |
| R-down-rtnA1-CTD   | AGCGGAAAAATTCGGGGGATCCAGGATACGTAATAGTTTTTAT<br>C                 | (SLIC) pYT313 rtnA1 <sup>-CTD</sup> |
| F-up-pYT-rtnC1ΔCt1 | TTTTAGTATCCGTATTCAAGGATCCTCTAGAGTCGACCTG                         | (SLIC) pYT313 rtnC1ΔCt1             |
| R-up-pYT-rtnC1ΔCt1 | TTTATTCATATCGATTACCCGGATCCCCGAATTTTCCGC                          | (SLIC) pYT313 rtnC1ΔCt1             |
| F-up-rtnC1ΔCt1     | ATATTCTATATGTGTTTCATAGTATTTTCAACAACACTTTC                        | (SLIC) pYT313 rtnC1ΔCt1             |
| R-up-rtnC1ΔCt1     | AGGTCGACTCTAGAGGATCCTGAATACGGATACTGAAAAAG                        | (SLIC) pYT313 rtnC1ΔCt1             |
| F-down-rtnC1ΔCt1   | CGGAAAAATTCGGGGGATCCGGGTAATCGATATGAAATAAAA<br>TTTAAG             | (SLIC) pYT313 rtnC1ΔCt1             |
| R-down-rtnC1ΔCt1   | AAAGTGTTGTTGAAAATACTATGAACACATATAGAATATC                         | (SLIC) pYT313 rtnC1ΔCt1             |
| F-up-pYT-d-rtnA2   | AACCTACCATCACGTAATGCTGGATCCTCTAGAGTCGACCTG                       | (SLIC) pYT313 ΔrtnA2                |
| R-up-pYT-d-rtnA2   | CTTTATTGATCTTGGTATCTGGATCCCCGAATTTTCCG                           | (SLIC) pYT313 ΔrtnA2                |
| F-up-d-rtnA2       | CGGAAAAATTCGGGGGATCCAGATACCAAGATCAATAAAG                         | (SLIC) pYT313 ΔrtnA2                |
| R-up-d-rtnA2       | GTAACCTTATTCATTTGTATGTAATGCTTTTTATTAGATG                         | (SLIC) pYT313 ΔrtnA2                |
| F-down-d-rtnA2     | CATCTAATAAAAAGCATTACATACAAATGAATAAAGTTAC                         | (SLIC) pYT313 ΔrtnA2                |
| R-down-d-rtnA2     | CAGGTCGACTCTAGAGGATCCAGCATTACGTGATGGTAGGTT<br>TTC                | (SLIC) pYT313 ΔrtnA2                |
| F-up-d-tssB-C      | AGGTCGACTCTAGAGGATCCCACTATTTGCTAGAAGCCAC                         | (SLIC) pYT313 ΔtssB-C               |
| R-up-d-tssB-C      | AATGTTGTTATTCTAACATATAAAAATTTGTTAATTTTTATTAAAT<br>A              | (SLIC) pYT313 ΔtssB-C               |
| F-down-d-tssB-C    | TTATATGTTAGAATAACAACATTAATTTTAATG                                | (SLIC) pYT313 ΔtssB-C               |
| R-down-d-tssB-C    | CGGAAAAATTCGGGGGATCCGAAGATTAGAAGCAGTCTGCC                        | (SLIC) pYT313 ΔtssB-C               |
| F-up-d-porZ        | GGAAAAATTCGGGGGATCCTCTAGATAGATCTTACCAAACAA<br>GGTAATAATAGTAATC   | (SLIC) pYT313 ΔporZ                 |
| R-up-d-porZ        | GTTTCATCAATTAACACTACTGCTATTTAATTATGCGATTACTGCT<br>ATCTATTG       | (SLIC) pYT313 ΔporZ                 |
| F-down-d-porZ      | TAGATAGCAGTATAATCGCATAATTAATAGCAGTAGTTAATTG<br>ATGAACTCA         | (SLIC) pYT313 ΔporZ                 |
| R-down-d-porZ      | CCATGATTACGCCAAGCTTGCATGCTATAAAAAATTATTTATTTT<br>ACCTTTTCGTGATGC | (SLIC) pYT313 ΔporZ                 |

|                           |                                                                 |                                       |
|---------------------------|-----------------------------------------------------------------|---------------------------------------|
| F-up-pYT-rtnC1D879N       | TTACTCCTCGATTTCGTATGGATCCTCTAGAGTCGACCTG                        | (SLIC) pYT313 rtnC1 <sup>D879N</sup>  |
| R-up-pYT-rtnC1D879N       | GATGGATTATCTGTTAGGACGGATCCCCGAATTTTCCG                          | (SLIC) pYT313 rtnC1 <sup>D879N</sup>  |
| F-up-rtnC1D879N           | AATTGAGCCTATAACAATAACTGTTTCTAGAGCGACACC                         | (SLIC) pYT313 rtnC1 <sup>D879N</sup>  |
| R-up-rtnC1D879N           | AGGTCGACTCTAGAGGATCCATACGAAATCGAGGAGTAAAG                       | (SLIC) pYT313 rtnC1 <sup>D879N</sup>  |
| F-down-rtnC1D879N         | CGGAAAAATTCGGGGGATCCGTCCTAACAGATAATCCATC                        | (SLIC) pYT313 rtnC1 <sup>D879N</sup>  |
| R-down-rtnC1D879N         | GGTGTGCTCTAGAAACAGTTATTGTTATAGGCTCAATTG                         | (SLIC) pYT313 rtnC1 <sup>D879N</sup>  |
| F-up-pYT-site2:rtn1       | ACTTATTAGAACAATTTAACCTAAAACCTTTGTCTAAATCTG                      | (SLIC) pYT313 <i>site2:rtn1</i>       |
| R-up-pYT-site2:rtn1       | TGATATTCTATATGTGTCATAAATTAATTATAATTAC                           | (SLIC) pYT313 <i>site2:rtn1</i>       |
| F-up-site2:rtn1           | AGTAATTAATAATTAATTTATGAACACATATAGAATATCAG                       | (SLIC) pYT313 <i>site2:rtn1</i>       |
| R-up-site2:rtn1           | AGATTTAGACAAAGTTTTAGGTTAAATTTGTTCTAATAAGTG                      | (SLIC) pYT313 <i>site2:rtn1</i>       |
| F-up-CNins2               | GGAAAAATTCGGGGGATCCTCTAGACACCATAACCCAAATTTCTCATAAA              | (GA) pYT313 site2:mLytchee            |
| R-up-CNins2               | CATCTGAATAGCTTTAAAACAAAGGGCTTTTGTATATCTGGAA<br>AAAGTCATGCA      | (GA) pYT313 site2:mLytchee            |
| F-down-CNins2             | ACGCACGGCATGGATGAGCTCTACAAATAACCTAAAACCTTTGTCTAAATCTGAAAAA      | (GA) pYT313 site2:mLytchee            |
| R-down-CNins2             | CCATGATTACGCCAAGCTTGCATGCCCGTACATTGTAACAAA<br>AGAATTAAT         | (GA) pYT313 site2:mLytchee            |
| F-ins2-verif              | GTAGTAGTCGCAGATAGTAAACTA                                        | (GA) pYT313 site2:mLytchee            |
| R-ins2-verif              | GTACAACGTATGTCAAGTACGGAGC                                       | (GA) pYT313 site2:mLytchee            |
| F-mLychee                 | ATGGATTCAACAGAAGCAATTATT                                        | (GA) pYT313 site2:mLytchee            |
| R-mLychee                 | TTACTTGTACAAACTTCCGCCA                                          | (GA) pYT313 site2:mLytchee            |
| R-CNins2-mLychee          | TAATAATTGCTTCTGTTGAATCCATAAATTAATTATAATTACT<br>AAAATCCCTTCA     | (GA) pYT313 site2:mLytchee            |
| F-CNins2-mLychee          | AAGGCGGCTCTGGCGGAAGTTTGTACAAGTAACCTAAAACCTT<br>TGCTAAATCTGAAAAA | (GA) pYT313 site2:mLytchee            |
| F-up-pYT-JUb129 site1:cmR | AGCAGCTAATGGTATTTTGGAGGATCCTCTAGAGTCGACCTG                      | (SLIC) pYT313 JUb129 <i>site1:cmR</i> |
| R-up-pYT-JUb129 site1:cmR | AGATTTTAGGAAAAGTTGAGGGATCCCCGAATTTTCCG                          | (SLIC) pYT313 JUb129 <i>site1:cmR</i> |
| F-up-JUb129 site1:cmR     | CGGAAAAATTCGGGGGATCCCTCAACTTTTCTAAAATCTG                        | (SLIC) pYT313 JUb129 <i>site1:cmR</i> |
| R-up-JUb129 site1:cmR     | CTTGGTATGCGCTGCCGAAAAATGCGAGAAGCTTTATTAAG                       | (SLIC) pYT313 JUb129 <i>site1:cmR</i> |

|                                             |                                              |                                            |
|---------------------------------------------|----------------------------------------------|--------------------------------------------|
| F-down-JUb129<br>site1:cmR                  | GAGTGGCAGGGCGGGGCGTAATGGCTTCTAATATAAGCTT     | (SLIC) pYT313 JUb129 <i>site1:cmR</i>      |
| R-down-JUb129<br>site1:cmR                  | AGGTCGACTCTAGAGGATCCTCCAAAATACCATTAGCTGC     | (SLIC) pYT313 JUb129 <i>site1:cmR</i>      |
| F-down-cmR                                  | TTAATAAAGTTCTCGCATTTTTTCGGCAGCGCATAACAAAG    | (SLIC) pYT313 JUb129 <i>site1:cmR</i>      |
| R-down-cmR                                  | AAGCTTATATTAGAAGCCATTACGCCCCGCCCTGCCACTC     | (SLIC) pYT313 JUb129 <i>site1:cmR</i>      |
| F-up-pYT-JUb129<br>site1:mLytchee           | GCGGAAGTTTGTACAAGTAATGGCTTCTAATATAAGCTTAC    | (SLIC) pYT313 JUb129 <i>site1:mLytchee</i> |
| R-up-pYT-JUb129<br>site1:mLytchee           | ATTGCTTCTGTGAATCCATTTTTTAATTACAATTTAGTTAATTA | (SLIC) pYT313 JUb129 <i>site1:mLytchee</i> |
| F-up-JUb129<br>site1:mLytchee               | TTAACTAAATTGTAATTAATAAATGGATTCAACAGAAGCAATT  | (SLIC) pYT313 JUb129 <i>site1:mLytchee</i> |
| R-up-JUb129<br>site1:mLytcheesit<br>e2:rtn1 | TAAGCTTATATTAGAAGCCATTACTTGTACAAACTCCGC      | (SLIC) pYT313 JUb129 <i>site1:mLytchee</i> |
| F-pBAD-MCS                                  | CTGCAGGCATGCAAGCTTGGC                        | (RL) pBAD33-plasmids                       |
| R-pBAD-SD-Sal                               | GATCAGTCGACCCTCCTTCTAGAGGATCCCCGGGTACCG      | (RL) pBAD33-Cyto plasmids                  |
| R-torA-ss-Sal                               | GACTGTGACCGCCGCGAGTCGCACGTCGC                | (RL) pBAD33-Peri plasmids                  |
| F-C1-CT-Sal                                 | GACTGTGACATGAATGAACTGGAAAAATTTATAGAGT        | (RL) pBAD33-Ct1                            |
| R-C1-CT-Hind                                | GACTAAGCTTCTATATGTGTTTCATTGTTCCCAT           | (RL) pBAD33-Ct1                            |
| F-C2-CT-Sal                                 | GACTGTGACATGGGAAGTGAAGATTTTGTACAGA           | (RL) pBAD33-Ct2                            |
| R-C2-CT-Sph                                 | CAGTGCATGCTTAATTTCTTTTATAAAAACGTGATGA        | (RL) pBAD33-Ct2                            |
| F-C3-CT-Sal                                 | GACTGTGACATGAGAGAAGGCTTAGGATGGGG             | (RL) pBAD33-Ct3                            |
| R-C3-CT-Sph                                 | CAGTGCATGCTCATTCTTTTACCATAATTTTATTG          | (RL) pBAD33-Ct3                            |
| F-C4-CT-Sal                                 | GACTGTGACATGAGAACCTGGGGGACCCGAAA             | (RL) pBAD33-Ct4                            |
| R-C4-CT-Sph                                 | CAGTGCATGCTTATTTGTCTTTAACATCTAGTGCTTTATA     | (RL) pBAD33-Ct4                            |
| F-C5-CT-Sal                                 | GACTGTGACATGAGACAAGGTACAGACTGGGT             | (RL) pBAD33-Ct5                            |
| R-C5-CT-Hind                                | GACTAAGCTTTTATCTGATTCCAAATTTAAATTAAGGTC      | (RL) pBAD33-Ct5                            |
| F-C6-CT-Sal                                 | GACTGTGACATGCAGGCTATGAAGCCTACACC             | (RL) pBAD33-Ct6                            |
| R-C6-CT-Hind                                | GACTAAGCTTTTATTTAGTATATTTTAAAGGATTAATTCCG    | (RL) pBAD33-Ct6                            |
| F-C7-CT-Sal                                 | GACTGTGACATGAGAGCTCCTATGGATGAATATG           | (RL) pBAD33-Ct7                            |
| R-C7-CT-Hind                                | GACTAAGCTTTTAAAGGTGTACCATTTTAAATATAAT        | (RL) pBAD33-Ct7                            |
| F-C8-CT-Sal                                 | GACTGTGACATGGAGGGAAAAGAGGGAGTA               | (RL) pBAD33-Ct8                            |
| R-C8-CT-Hind                                | GACTAAGCTTCTACTTATATTTTAAAACCGGGT            | (RL) pBAD33-Ct8                            |
| F-C1-CT-Y7A                                 | GCGAGAGTCCCTGGAGATCAGAC                      | (MUT) pBAD33 Cyto-Ct1Y7A                   |
| R-C1-CT-Y7A                                 | AATTTTCCAGTTTCATTTCATGTCCG                   | (MUT) pBAD33 Cyto-Ct1Y7A                   |
| F-C1-CT-Y20A                                | GCGATTGGAAGAACTAAACAACGTAG                   | (MUT) pBAD33 Cyto-Ct1Y20A                  |

|                   |                                                                                                  |                                         |
|-------------------|--------------------------------------------------------------------------------------------------|-----------------------------------------|
| R-C1-CT-Y20A      | CGGTTTGCCACTTTCTGTCT                                                                             | (MUT) pBAD33 Cyto-Ct1Y20A               |
| F-pBAD-C9-CT      | TTACCGAATGTTCCATCCATGTCGACCCTCCTTCTAGAGG                                                         | (SLIC) pBAD33 Cyto-Ct9                  |
| R-pBAD-C9-CT      | TGGCCGTTTTATAAAGAATAAGCATGCAAGCTTGGCTGTTTTG                                                      | (SLIC) pBAD33 Cyto-Ct9                  |
| F-C9-CT           | CCTCTAGAAGGAGGGTCGACATGGATGGAACATTCGGTAA                                                         | (SLIC) pBAD33 Cyto-Ct9                  |
| R-C9-CT           | AAAACAGCCAAGCTTGCATGCTTATTCTTTATAAAACGGCCAT                                                      | (SLIC) pBAD33 Cyto-Ct9                  |
| F-pBAD-C9-P       | TGTTTTACCGAATGTTCCATCCATGTCGACC GCCGAGTCG                                                        | (SLIC) pBAD33 Peri-Ct9                  |
| R-pBAD-C9-P       | TGGCCGTTTTATAAAGAATAAGCATGCAAGCTTGGCTGTTTTG                                                      | (SLIC) pBAD33 Peri-Ct9                  |
| F-C9-P            | GACTGCGCGGTGTCGACATGGATGGAACATTCGGTAAACA                                                         | (SLIC) pBAD33 Peri-Ct9                  |
| R-C9-P            | AAAACAGCCAAGCTTGCATGCTTATTCTTTATAAAACGGCCAT                                                      | (SLIC) pBAD33 Peri-Ct9                  |
| F-pETd-synth      | GCCAGGATCCGAATTCGAGCTC                                                                           | Construction of Duet plasmids with pelB |
| R-pelB-duet       | GGCCATCGCCGGCTGGGCAGCGAGGAGCAGCAGACCAGC<br>AGCAGCGGTCCGCGCAGGTATTTTCATGGTATATCTCCTTATT<br>AAAGTT | Construction of Duet plasmids with pelB |
| R-pel-sac         | GGAGGAGCTCGGCCATCGCCGGCTGGGCAG                                                                   | (RL) Duet plasmids with pelB            |
| F-duet-strep-sal  | GACTGTGCGACTGGAGCCACCCGAGTTCGAAAAATAAAAGC<br>TTGCGGCCGCATAATGC                                   | (RL) Duet plasmids with C-ter strep     |
| F-duet-flag-sal   | GACTGTGCGACTGGAGCCACCCGAGTTCGAAAAATAAAAGC<br>TTGCGGCCGCATAATGC                                   | (RL) Duet plasmids with C-ter flag      |
| F-RtnA1-Sac       | GGAGGAGCTCCAGGAAGTCGTCTGGCAAAGAA                                                                 | (RL) pACYC-Duet pelB-RtnA1-Strep / Flag |
| R-RtnA1-Sal       | GATCGTGCACITTTCTTAATCAATTTTGC GTTTGC                                                             | (RL) pACYC-Duet pelB-RtnA1-Strep / Flag |
| F-RtnB1-Sac       | GGAGGAGCTCCAAATAATACCTACCATTAATCTCC                                                              | (RL) pRSF-Duet pelB-RtnB1-Strep / Flag  |
| R-RtnB1-Sal       | GATCGTGCACGTTCTTGTAATTGTATTATATTCTTTCA                                                           | (RL) pRSF-Duet pelB-RtnB1-Strep / Flag  |
| F-RtnC1-Sac       | GGAGGAGCTCCAGTTAAGTCTACTGAAAAC                                                                   | (RL) pCDF-Duet pelB-RtnC1-Flag          |
| R-RtnC1-Sal       | GATCGTGCACATGTGTTTCATTGTTCCCATAT                                                                 | (RL) pCDF-Duet pelB-RtnC1-Flag          |
| F-pACYC-RtnA1ΔCTD | AAACAAATTGATCAATTAATAGTCGACTGGAGCCAC                                                             | (SLIC) pACYC-Duet pelB-RtnA1ΔCTD-Strep  |
| R-pACYC-RtnA1ΔCTD | TATAATTGATCAATTTGTTTATCTCCTAACTTGATAATTTCC                                                       | (SLIC) pACYC-Duet pelB-RtnA1ΔCTD-Strep  |
| F-pACYC-RtnA2ΔCTD | GTCGACTGGAGCCACCCGAGTTCGAAAAATAAAAGCTTGC<br>GGCCGCATAATG                                         | (SLIC) pACYC-Duet pelB-RtnA2ΔCTD-Strep  |
| R-pACYC-RtnA2ΔCTD | TTATTTTTCGAACTGCGGGTGGCTCCAGTCGACGATTAATTGA<br>TCAATTTG                                          | (SLIC) pACYC-Duet pelB-RtnA2ΔCTD-Strep  |
| F-pCDF-RtnC1D879N | AATCCATTAAGTGAGAAATTC                                                                            | (SLIC) pCDF-Duet pelB-RtnC1D879N-Flag   |
| R-pCDF-RtnC1D879N | AGTTGTGGCAAATCTCCCAATATC                                                                         | (SLIC) pCDF-Duet pelB-RtnC1D879N-Flag   |

**Table S5 | cryo-EM data collection, processing and model refinement statistics**

|                                                | <b>RtnB1-RtnC1</b> |
|------------------------------------------------|--------------------|
| PDB accession code                             | 29RD               |
| EMDB accession code                            | EMD-57319          |
| <b>Data collection</b>                         |                    |
| Microscope                                     | Talos Arctica      |
| Camera                                         | Gatan K2 Summit    |
| Voltage (kV)                                   | 200                |
| Magnification                                  | 45 000             |
| Total Dose                                     | 49.95              |
| <b>Processing</b>                              |                    |
| Symmetry imposed                               | C1                 |
| Micrographs number                             | 6401               |
| Initial particle images (no.)                  | 2204596            |
| Final particle images (no.)                    | 379537             |
| Map resolution (Å)–(0.143 FSC threshold model) | 3.4                |
| <b>Model composition</b>                       |                    |
| No. of chains                                  | 2                  |
| No. of residues                                | 1852               |
| No. of atoms                                   | 14836              |
| No. of ligands                                 | 0                  |
| Bond lengths (Å)                               | 0.002              |
| Bond angles (°)                                | 0.547              |
| Ramachandran favored %                         | 97.23              |
| Ramachandran allowed %                         | 2.77               |
| Ramachandran outliers %                        | 0.00               |
| Rotamers outliers %                            | 0.55               |
| MolProbity score                               | 1.17               |
| Clashscore                                     | 2.44               |
| CC (mask)                                      | 0.83               |
| CC (box)                                       | 0.74               |
| CC (peaks)                                     | 0.72               |
| CC (volume)                                    | 0.80               |

## REFERENCES

1. Page, A. P. *et al.* The golden death bacillus *Chryseobacterium nematophagum* is a novel matrix digesting pathogen of nematodes. *BMC Biol* **17**, 10 (2019).
2. Rhodes, R. G., Pucker, H. G. & McBride, M. J. Development and Use of a Gene Deletion Strategy for *Flavobacterium johnsoniae* To Identify the Redundant Gliding Motility Genes *remF*, *remG*, *remH*, and *remI* ▽. *J Bacteriol* **193**, 2418–2428 (2011).
3. Guzman, L. M., Belin, D., Carson, M. J. & Beckwith, J. Tight regulation, modulation, and high-level expression by vectors containing the arabinose PBAD promoter. *J Bacteriol* **177**, 4121–4130 (1995).
4. Zhu, Y. *et al.* Genetic analyses unravel the crucial role of a horizontally acquired alginate lyase for brown algal biomass degradation by *Zobellia galactanivorans*. *Environ Microbiol* **19**, 2164–2181 (2017).
5. Agarwal, S., Hunnicutt, D. W. & McBride, M. J. Cloning and characterization of the *Flavobacterium johnsoniae* (*Cytophaga johnsonae*) gliding motility gene, *gldA*. *Proc Natl Acad Sci U S A* **94**, 12139–12144 (1997).
